# Supplementary material for: Risk-adapted intervals for colorectal cancer screening using fecal immunochemical tests
Source: Research Square preprint supplement (doi:10.21203/rs.3.rs-8521179/v1), 2026-01-19
Supplement: Supplementary file 1 [file 4f1a76486be21276e72290e1.docx]

## **SUPPLEMENTARY MATERIAL**

**Risk-adapted intervals for colorectal cancer screening
using fecal immunochemical tests**

Risk-adapted FIT Screening

Thomas Heisser, Teresa Seum, Michael Hoffmeister, Hermann Brenner

Table of Contents

[**SUPPLEMENTARY MATERIAL** 1](#_Toc193721088)

[**Supplementary Appendix 1. COSIMO Model Documentation** 2](#_Toc193721089)

[**Supplementary Appendix 2. BLITZ Study** 5](#_Toc193721090)

[**Supplementary Appendix 3. Supplementary Tables and Figures** 7](#_Toc193721091)

[**Supplementary References** 14](#_Toc193721092)

### **Supplementary Appendix 1. COSIMO Model Documentation**

#### **Conceptual model structure**

Our Markov-based Colorectal Cancer Multistate Simulation Model (COSIMO) simulates the natural history of CRC based on the process of precursor lesions (non-advanced and advanced adenomas) developing into preclinical (asymptomatic) and then clinical (symptomatic) cancer. The simulation is performed on a hypothetical previously unscreened German population, with the number of simulated subjects and their corresponding baseline age (minimum 50 years) being variables to be chosen prior to model start. COSIMO can principally be used for simulating any population, provided updated or appropriately adjusted input parameters.

At the start of the simulation, certain proportions of no neoplasm, non-advanced adenoma, advanced adenoma and preclinical CRC are assigned to the hypothetical population. The simulation runs up to a predefined number of cycles of each one year. Each year, people in each state have a certain probability (transition rate) to progress to the next state. Subjects with CRC may die from the disease, and at each state people may experience non-CRC death, reflecting the general background mortality from other causes.

Screening can alter the progression between states. People with adenoma will be moved backward to the state of no neoplasm, assuming removal of their adenoma at colonoscopy (for screening or diagnostic workup, e.g., after a positive fecal test). Subjects will then continue to have the probabilities of progressing to the next states as those without findings at screening. We assume that, although these people are under a higher risk of developing adenomas or cancers than the general population [1], the excess risk will be effectively compensated through the protection provided by surveillance colonoscopies [2, 3]. Preclinical CRC detected at screening will be moved forward to the state of diagnosed cancer.

After each cycle where a screening test was applied, the model differentiates the simulated population into a ‘screening negative’ and a ‘screening positive’ group, which allows modelling different trajectories depending on the screening outcome. In such scenarios, subjects only receive the next screening round if they had a negative test result in the respective previous round. In the base case model, subjects with false-positive test results (e.g., a diagnostic colonoscopy without finding after a positive fecal immunochemical test) return to the screening population after a latency period of 10 years. Subjects with detected non-advanced adenomas are assumed to undergo surveillance colonoscopies at intervals of 10 years up to a predefined end age of 75 years. In case an advanced adenoma was detected, either at the primary screening test or at a surveillance colonoscopy, subjects are assumed to undergo periodic surveillance colonoscopies at three-yearly intervals up a predefined end age of 85.

The model source code, developed in the statistical software R (version 4.1.2), is available from our website [4].

#### **Model parameters**

**Starting prevalences and transition rates**

An overview of key model parameters (if not provided in the main manuscript) is given in **Supplementary** **Table 1**.

*Data source*

The data basis of our analyses on model starting prevalences and transition rates was the nationwide screening colonoscopy registry run by the Central Research Institute of Ambulatory Health Care in Germany. The registry, which was built up along with the introduction of the screening colonoscopy offer in the year 2002, is a repository of all screening colonoscopies conducted in Germany. Reporting is virtually complete, as it is a prerequisite for physicians’ reimbursement by the health insurance funds. The registry includes only primary screening examinations (i.e., colonoscopies conducted for surveillance, work-up of symptoms or other screening tests are not included). Items reported include, besides basic sociodemographic variables, findings at colonoscopy, including number, size and histological characteristics of polyps. In case of multiple neoplasms, only the most advanced one (non-advanced adenoma, advanced adenoma, or cancer) is recorded. Advanced adenomas are defined as at least 1 adenoma ≥ 1 cm or at least 1 adenoma with villous components or high-grade dysplasia.

The reporting for the screening colonoscopy registry does not differentiate by the class of lesion. Thus, the herein used term ‘adenoma’ refers to conventional or serrated adenomas (polyps) alike. While we preferred to refer to our model as being based on the adenoma-carcinoma pathway in previous publications [5–9] for the sake of simplicity and comprehensibility (as the grand majority of CRCs develops through this well-established pathway of cancer development [10, 11]), in fact COSIMO’s defining parameters were derived using polyp/adenoma prevalences as detected and reported at screening colonoscopy, regardless of their underlying mechanism or pathway of development. Therefore, it will be more precise to refer to the model as being based on the ‘natural history of CRC’, without restrictions on underlying CRC development pathways.

*Starting prevalence*

See main manuscript.

*Transition rates*

Transition rates between states were estimated based on data from the nationwide screening colonoscopy registry by several separate birth cohort and mean sojourn time analysis. Details on the principles of these methods have been described previously [12–14]. Briefly, sex- and age-specific annual incidence and transition rates were estimated from sex- and age-specific prevalences of adenomas among 3.6 – 4.3 million screening participants from the same birth cohorts in 2003–2011 (2003-2009) and 2004–2012 (2004 – 2010). The analysis on mean sojourn time of preclinical cancers additionally incorporated registry-reported colorectal cancer incidence and participation rates in screening colonoscopy from 2003-2006.

As colonoscopy was shown to be less effective in detecting serrated lesions (and as the true proportions of missed conventional adenomas and serrated lesions in the registry-reported prevalences is unknown), we re-calculated previously reported transition rates [12–14] to adjust for representative colonoscopy miss rates [15, 16]. This adjustment resulted in slightly higher overall prevalences of adenomas, and therefore (when compared to previously reported rates) in slightly higher transition rates of incidence adenomas, as well as slightly lower transition rates from non-advanced to advanced adenomas and from adenomas to cancer. Furthermore, to adjust for uncertainties resulting from the cycle length of one year used in COSIMO, we updated the model to allow for small proportion of subjects with very rapidly progressing lesions with limited potential for early detection and associated worse prognosis. Age- and sex-specific annual transition rates between the states were estimated for age groups from 55-79 years in steps of 5 years. Estimates for age 50-54 and ≥ 80 (or ≥ 85) were assumed to be the same as those for age group 55-59 and 75-79 (or 80-84), respectively.

Confidence intervals for both starting prevalences and transition rates were derived by bootstrap analysis with resampling within sex- and age-specific subgroups. Ninety-five percent confidence intervals were determined as the 2.5th and 97.5th percentile of transition rate estimates obtained in 1,000 runs.

**Mortality rates**

Mortality rates for patients whose cancer was detected by screening or by symptoms were estimated in previous analyses [8, 9]. We combined data on the proportion of screening-detected cases among all CRC cases in Germany during 2003-2012 in people aged 55-79 years [5, 17] with the overall CRC-specific mortality rates by year after diagnosis in Germany in 2011-2012 [17]. We then used hazard ratios for patients detected by screening versus symptoms as obtained from a German population-based case-control study on CRC screening with long-term mortality follow-up of CRC patients [8, 18] to estimate CRC-specific mortality rates by mode of detection (**Supplementary** **Table 2**). Sex- and age-specific general mortality rates and average life expectancy of the population were extracted from German population life tables 2010/2012 (**Supplementary** **Table 3)** [19].

**Model validation**

COSIMO has been validated for the German screening-eligible population. Details on the model validation process can be found in the literature [20]. Briefly, we pursued a three-fold approach using the best available evidence from epidemiological data sources in Germany. We compared model-derived cumulative incidence and prevalences of colorectal neoplasms to (a) results from KolosSal, a study in German screening colonoscopy participants, (b) registry-based estimates of CRC incidence in Germany, and (c) outcome patterns of randomized sigmoidoscopy screening studies. This approach enabled us to scrutinize the model's natural history component (Parts a and b) as well as the modeled effect of screening colonoscopy (Parts b and c) at the same time.

We found that (a) more than 90% of observed prevalences in the KolosSal study were within the 95% confidence intervals of the model-predicted neoplasm prevalences; (b) the 15-year cumulative CRC incidences estimated by simulations for the German population deviated by 0.0% to 0.2% units in men and 0.0% to 0.3% units in women when compared to corresponding registry-derived estimates; and (c) the time course of cumulative CRC incidence and mortality in the modeled intervention group and control group closely resembles the time course reported from sigmoidoscopy screening trials. Overall, COSIMO adequately predicted colorectal neoplasm prevalences and incidences in a German population for up to 25 years, with estimated patterns of the effect of screening colonoscopy resembling those seen in registry data and real-world studies.

### **Supplementary Appendix 2. BLITZ Study**

#### **Study design and study population**

BliTz (Begleitende Evaluierung innovativer Testverfahren zur Darmkrebsfrüherkennung) is a large ongoing study among participants of screening colonoscopy which is conducted by the German Cancer Research Center (DKFZ) in collaboration with 20 gastroenterology practices in Southern Germany with the primary aim to evaluate novel stool and blood tests for CRC screening. In Germany, screening colonoscopy has been offered as a primary screening exam for men and women aged 55 or older since 2002. In 2019 the starting age was lowered to 50 years for men. In April 2025, starting age was also lowered to 50 years for women. Up to two screening colonoscopies 10 or more years apart and conducted mostly by gastroenterology practices. Only experienced endoscopists are entitled to do screening colonoscopies which are subject to rigorous measures of quality assurance.

Participants for this analysis were selected from 10,061 participants undergoing colonoscopy for primary screening who were recruited between November 2008 and December 2020 when the same quantitative FIT (FOB Gold, Sentinel Diagnostics, Milan, Italy) was applied. Participants were asked to complete a questionnaire and to donate blood and stool samples before colonoscopy. All participants provided written informed consent. The BliTz study was approved by the ethics committees of Heidelberg University and the state medical chambers of Baden-Württemberg, Saarland, Rhineland Palatinate and Hesse.

We applied the following exclusion criteria to ensure representativeness of the study population for an average risk screening population and to minimize the risk of missed neoplasms (**Supplementary Figure 2):** age <50 or ≥80 years (N=426), history of CRC or inflammatory bowel disease (N=90), colonoscopy in the past 5 years (N=806), inadequate bowel preparation (N=959), incomplete colonoscopy (N=89), undefined polyp from colonoscopy findings (N=219), stool sampling after colonoscopy (N=74), and positive FIT (N=737, i.e. hemoglobin concentration ≥17 µg/g). Thus, 6,661 participants were finally included.

#### **Data collection**

Participants were asked to fill out a standardized questionnaire prior to colonoscopy including questions about sociodemographic and lifestyle factors. Data from colonoscopy and pathology reports were extracted independently by two trained research assistants who were blinded with respect to the questionnaire and FIT results. Colonoscopy results were categorized according to the most advanced findings: CRC, advanced adenoma, non-advanced adenoma, other or no finding. The main outcome for this analysis was advanced neoplasia, defined as either CRC or advanced adenoma. Adenomas with at least one of the following features were defined as advanced: ≥ 1 cm, tubulovillous or villous components, or high-grade dysplasia.

#### **Fecal immunochemical test**

Participants were asked to collect a fecal sample without any dietary or medication restrictions before bowel preparation for colonoscopy. Between 2008 and 2012, samples were preserved in a stool-filled container in a freezer or a refrigerator at participants’ home and were brought to the gastroenterology practice on the day of colonoscopy. On receipt, the containers were immediately frozen at -20°C in the practice, and were afterwards shipped to a central laboratory on dry ice within a few days. From 2012 onwards, participants mailed the FIT samples in tubes containing hemoglobin-stabilizing buffer to the German Cancer Research Center from where they were transported to the central laboratory in a cold chain. Previous analyses have shown that both methods of stool collection yielded highly comparable FIT results [21]. All analyses of FOB Gold were conducted at a central accredited laboratory (Limbach Laboratory, Heidelberg, Germany) on Abbott Architect c8000 (analytical range: 0.03 to 142 µg hemoglobin/g feces) by experienced laboratory personnel who were blinded to the colonoscopy results. According to the recommendation given by the manufacturer, values <17 µg hemoglobin/g feces were considered negative.

### **Supplementary Appendix 3. Supplementary Tables and Figures**

#### **Supplementary Table 1.** Overview of model parameters

| **A. Sex- and age-specific annual transition rates between states1** | | | | | |  |
| --- | --- | --- | --- | --- | --- | --- |
|  |  | **Annual transition rates**  **% (95% confidence interval)** | | | |  |
| **Sex** | **Age** | **No neoplasm to non-advanced adenoma** | **Non-advanced adenoma to advanced adenoma** | **Advanced adenoma to preclinical colorectal cancer** | **Preclinical colorectal cancer to clinical colorectal cancer** | **Preclinical colorectal cancer to colorectal cancer death** |
| Men | 50-54 | 3.1 (2.9 – 3.4) | 3.3 (2.8 – 3.9) | 2.6 (2.2 – 3.1) | 15.5 (14.9 – 16.6) | 1.5 (1.4 – 1.6) |
|  | 55-59 | 3.1 (2.9 – 3.4) | 3.3 (2.8 – 3.9) | 2.6 (2.2 – 3.1) | 15.5 (14.9 – 16.6) | 1.5 (1.4 – 1.6) |
|  | 60-64 | 3.1 (2.8 – 3.4) | 3.2 (2.6 – 3.7) | 3.1 (2.6 – 3.4) | 16.4 (15.7 – 17.4) | 1.6 (1.6 – 1.7) |
|  | 65-69 | 3.2 (2.9 – 3.4) | 3.2 (2.6 – 3.7) | 3.8 (3.4 – 4.3) | 18.2 (17.4 – 19.1) | 1.8 (1.7 – 1.9) |
|  | 70-74 | 2.9 (2.6 – 3.3) | 3.3 (2.6 – 4.0) | 5.1 (4.5 – 5.8) | 17.6 (16.8 – 18.5) | 1.7 (1.7 – 1.8) |
|  | 75-79 | 2.3 (1.8 – 2.9) | 3.0 (1.9 – 4.2) | 5.2 (4.2 – 6.2) | 17.3 (16.3 – 18.3) | 1.7 (1.6 – 1.8) |
|  | 80+ | 2.3 (1.8 – 2.9) | 3.0 (1.9 – 4.2) | 5.2 (4.2 – 6.2) | 15.7 (14.5 – 17.1) | 1.6 (1.4 –1.7) |
| Women | 50-54 | 1.8 (1.7 – 2.0) | 3.2 (2.6 – 3.8) | 2.5 (2.0 – 2.9) | 18.2 (16.8 – 19.7) | 1.9 (1.8 – 2.1) |
|  | 55-59 | 1.8 (1.7 – 2.0) | 3.2 (2.6 – 3.8) | 2.5 (2.0 – 2.9) | 18.2 (16.8 – 19.7) | 1.9 (1.8 – 2.1) |
|  | 60-64 | 2.0 (1.8 – 2.2) | 2.9 (2.2 – 3.4) | 2.7 (2.2 – 3.2) | 19.1 (17.8 – 20.3) | 2.0 (1.9 – 2.1) |
|  | 65-69 | 2.1 (1.9 – 2.3) | 2.9 (2.3 – 3.5) | 3.8 (3.3 – 4.3) | 18.7 (17.7 – 19.7) | 2.0 (1.9 – 2.1) |
|  | 70-74 | 2.0 (1.7 – 2.2) | 3.8 (3.0 – 4.6) | 5.0 (4.2 – 5.7) | 17.8 (16.8 – 18.9) | 1.9 (1.8 – 2.0) |
|  | 75-79 | 1.6 (1.1 – 2.0) | 3.0 (1.7 – 4.4) | 5.6 (4.4 – 6.8) | 16.5 (15.5 – 17.7) | 1.7 (1.6 – 1.9) |
|  | 80+ | 1.6 (1.1 – 2.0) | 3.0 (1.7 – 4.4) | 5.6 (4.4 – 6.8) | 14.9 (13.9 – 16.1) | 1.6 (1.4 – 1.7) |
| | **B. Diagnostic performance parameters colonoscopy** | | | | | | | --- | --- | --- | --- | --- | --- | |  |  | **Performance (%)** | | | | | **Test** | **Parameter** | **No neoplasm** | **Non-advanced adenoma** | **Advanced adenoma** | **Preclinical colorectal cancer** | | Colonoscopy2 | Sensitivity | - | 75.0 | 95.0 | 95.0 | | Specificity | 100 | - | - | - | | 1 Estimates extracted and recalculated from references [12–14]  2 Estimates based on references [15, 16] | | | | | | |  | | | | | | | | | | | | | |

#### **Supplementary Table 2.** Annual CRC-specific mortality rates of CRC patients by mode of cancer detection1

|  | **Annual CRC-specific mortality rates (%)** | | | |
| --- | --- | --- | --- | --- |
| **Year after diagnosis** | **Screening colonoscopy– detected cases** | | **Symptom-detected cases** | |
| **Men** | **Women** | **Men** | **Women** |
| 1 | 4.6 | 3.7 | 19.7 | 20.6 |
| 2 | 2.2 | 1.9 | 9.3 | 10.7 |
| 3 | 2.1 | 1.3 | 8.8 | 7.4 |
| 4 | 1.5 | 0.9 | 6.3 | 4.8 |
| 5 | 1.2 | 0.6 | 5.0 | 3.3 |
| 6 | 0.8 | 0.3 | 3.5 | 1.7 |
| 7 | 0.4 | 0.3 | 1.8 | 1.8 |
| 8 | 0.4 | 0.3 | 1.9 | 1.8 |
| 9 | 0.4 | 0.0 | 1.9 | 0.0 |
| 10 | 0.0 | 0.0 | 0.0 | 0.0 |

1 Estimates extracted from references [8, 9]

CRC, Colorectal cancer.

#### **Supplementary Table 3.** Sex- and age-specific general mortality rates

|  | **General mortality rates from age to age +1 (%)**1 | |
| --- | --- | --- |
| **Age** | **Men** | **Women** |
| 50 | 0.4 | 0.2 |
| 51 | 0.4 | 0.2 |
| 52 | 0.5 | 0.3 |
| 53 | 0.6 | 0.3 |
| 54 | 0.6 | 0.3 |
| 55 | 0.7 | 0.4 |
| 56 | 0.7 | 0.4 |
| 57 | 0.8 | 0.4 |
| 58 | 0.9 | 0.4 |
| 59 | 1.0 | 0.5 |
| 60 | 1.0 | 0.5 |
| 61 | 1.1 | 0.6 |
| 62 | 1.2 | 0.6 |
| 63 | 1.3 | 0.7 |
| 64 | 1.4 | 0.7 |
| 65 | 1.5 | 0.8 |
| 66 | 1.7 | 0.9 |
| 67 | 1.8 | 0.9 |
| 68 | 1.9 | 1.0 |
| 69 | 2.1 | 1.1 |
| 70 | 2.2 | 1.2 |
| 71 | 2.4 | 1.3 |
| 72 | 2.7 | 1.4 |
| 73 | 3.0 | 1.6 |
| 74 | 3.3 | 1.8 |
| 75 | 3.7 | 2.1 |
| 76 | 4.1 | 2.4 |
| 77 | 4.6 | 2.7 |
| 78 | 5.2 | 3.1 |
| 79 | 5.8 | 3.6 |

*Continued on next page*

***Supplementary* Table 3.** *Sex- and age-specific general mortality rates (continued)*

|  | **General mortality rates from age to age +1 (%)**1 | |
| --- | --- | --- |
| **Age** | **Men** | **Women** |
| 80 | 6.5 | 4.1 |
| 81 | 7.2 | 4.7 |
| 82 | 8.0 | 5.4 |
| 83 | 8.9 | 6.2 |
| 84 | 9.9 | 7.1 |
| 85 | 11.1 | 8.2 |
| 86 | 12.3 | 9.3 |
| 87 | 13.7 | 10.7 |
| 88 | 15.3 | 12.1 |
| 89 | 16.9 | 13.7 |
| 90 | 18.7 | 15.4 |
| 91 | 20.7 | 17.2 |
| 92 | 22.7 | 19.1 |
| 93 | 24.8 | 21.1 |
| 94 | 27.0 | 23.2 |
| 95 | 29.1 | 25.3 |
| 96 | 31.2 | 27.4 |
| 97 | 33.2 | 29.6 |
| 98 | 35.1 | 31.7 |
| 99 | 37.2 | 34.0 |
| 100 | 39.2 | 36.2 |

1Estimates were extracted from German population life tables 2010/2012 (reference [19]).


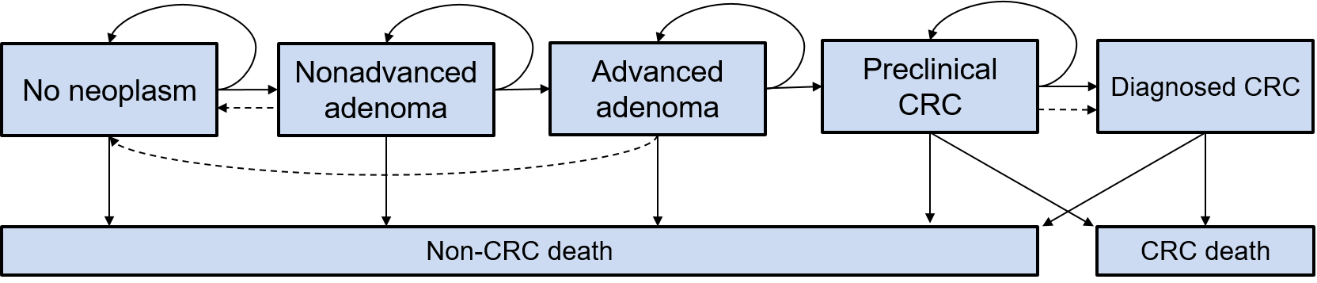


#### **Supplementary Figure 1. Schematic illustration of the Colorectal Cancer Multistate Simulation Model (COSIMO)**

Solid lines represent the progression of colorectal disease through the adenoma-carcinoma sequence in the absence of screening; dashed lines show the movement between states because of the detection and removal of adenomas and the detection of asymptomatic CRC at screening.

CRC: Colorectal cancer.

N = 959

Inadequate bowel preparation

N = 426

Age <50 or ≥80 years

N = 806

Colonoscopy in the past 5 years

N = 90

History of CRC or inflammatory bowel disease

N = 89

Incomplete colonoscopy

N = 219

Undefined polyp from colonoscopy findings

N = 74

Stool sample collected after colonoscopy

N = 737

Positive FIT result

N = 6,661

Included in analysis

Participants with colonoscopy and FIT results: 10,061

#### **Supplementary Figure 2. Flow diagram of study participants**

### **Supplementary References**

1. Cottet V, Jooste V, Fournel I, Bouvier AM, Faivre J, Bonithon-Kopp C. Long-term risk of colorectal cancer after adenoma removal: a population-based cohort study. Gut. 2012;61:1180–6. https://doi.org/10.1136/gutjnl-2011-300295.

2. Lieberman DA, Rex DK, Winawer SJ, Giardiello FM, Johnson DA, Levin TR. Guidelines for colonoscopy surveillance after screening and polypectomy: a consensus update by the US Multi-Society Task Force on Colorectal Cancer. Gastroenterology. 2012;143:844–57. https://doi.org/10.1053/j.gastro.2012.06.001.

3. Hassan C, Quintero E, Dumonceau JM, Regula J, Brandao C, Chaussade S, et al. Post-polypectomy colonoscopy surveillance: European Society of Gastrointestinal Endoscopy (ESGE) Guideline. Endoscopy. 2013;45:842–51. https://doi.org/10.1055/s-0033-1344548.

4. German Cancer Research Center (DKFZ), Department Clinical Epidemiology and Aging Reserach. Download Page for COSIMO Source Code. 2023. https://www.dkfz.de/en/klinepi/download/index.html. Accessed 20 June 2023.

5. Brenner H, Altenhofen L, Stock C, Hoffmeister M. Prevention, early detection, and overdiagnosis of colorectal cancer within 10 years of screening colonoscopy in Germany. Clin Gastroenterol Hepatol. 2015;13:717–23. https://doi.org/10.1016/j.cgh.2014.08.036.

6. Brenner H, Altenhofen L, Stock C, Hoffmeister M. Expected long-term impact of the German screening colonoscopy programme on colorectal cancer prevention: Analyses based on 4,407,971 screening colonoscopies. Eur J Cancer. 2015;51:1346–53. https://doi.org/10.1016/j.ejca.2015.03.020.

7. Brenner H, Kretschmann J, Stock C, Hoffmeister M. Expected long-term impact of screening endoscopy on colorectal cancer incidence: A modelling study. Oncotarget. 2016;7:48168–79. https://doi.org/10.18632/oncotarget.10178.

8. Chen C, Stock C, Hoffmeister M, Brenner H. How long does it take until the effects of endoscopic screening on colorectal cancer mortality are fully disclosed?: a Markov model study. Int J Cancer. 2018;143:2718–24. https://doi.org/10.1002/ijc.31716.

9. Chen C, Stock C, Hoffmeister M, Brenner H. Optimal age for screening colonoscopy: a modeling study. Gastrointest Endosc. 2019;89:1017-1025.e12. https://doi.org/10.1016/j.gie.2018.12.021.

10. Dekker E, Tanis PJ, Vleugels JLA, Kasi PM, Wallace MB. Colorectal cancer. Lancet. 2019;394:1467–80. https://doi.org/10.1016/S0140-6736(19)32319-0.

11. Winawer SJ. Natural history of colorectal cancer. Am J Med. 1999;106:3–6. https://doi.org/10.1016/S0002-9343(98)00338-6.

12. Brenner H, Altenhofen L, Katalinic A, Lansdorp-Vogelaar I, Hoffmeister M. Sojourn Time of Preclinical Colorectal Cancer by Sex and Age: Estimates From the German National Screening Colonoscopy Database. Am J Epidemiol. 2011;174:1140–6. https://doi.org/10.1093/aje/kwr188.

13. Brenner H, Altenhofen L, Stock C, Hoffmeister M. Natural history of colorectal adenomas: birth cohort analysis among 3.6 million participants of screening colonoscopy. Cancer Epidemiol Biomarkers Prev. 2013;22:1043–51. https://doi.org/10.1158/1055-9965.Epi-13-0162.

14. Brenner H, Altenhofen L, Stock C, Hoffmeister M. Incidence of colorectal adenomas: birth cohort analysis among 4.3 million participants of screening colonoscopy. Cancer Epidemiol Biomarkers Prev. 2014;23:1920–7. https://doi.org/10.1158/1055-9965.Epi-14-0367.

15. van Rijn JC, Reitsma JB, Stoker J, Bossuyt PM, van Deventer SJ, Dekker E. Polyp miss rate determined by tandem colonoscopy: a systematic review. Am J Gastroenterol. 2006;101:343–50. https://doi.org/10.1111/j.1572-0241.2006.00390.x.

16. Zhao S, Wang S, Pan P, Xia T, Chang X, Yang X, et al. Magnitude, Risk Factors, and Factors Associated With Adenoma Miss Rate of Tandem Colonoscopy: A Systematic Review and Meta-analysis. Gastroenterology. 2019;156:1661-1674.e11. https://doi.org/10.1053/j.gastro.2019.01.260.

17. Zentrum für Krebsregisterdaten. Krebsstatistiken für Deutschland - Interaktive Datenbank (Centre for Cancer Registry Data: Cancer Statistics for Germany - Interactive Database). 2021. https://www.krebsdaten.de/Krebs/DE/Datenbankabfrage/datenbankabfrage_stufe1_node.html. Accessed 7 Nov 2022.

18. Weigl K, Jansen L, Chang-Claude J, Knebel P, Hoffmeister M, Brenner H. Family history and the risk of colorectal cancer: The importance of patients’ history of colonoscopy. Int J Cancer. 2016;139:2213–20. https://doi.org/10.1002/ijc.30284.

19. Statistisches Bundesamt (Federal Office of Statistics). Allgemeine Sterbetafel 2010/2012. (General Life Table 2010/2012). 2015. https://www-genesis.destatis.de. Accessed 7 Nov 2022.

20. Heisser T, Hoffmeister M, Brenner H. Effects of screening for colorectal cancer: Development, documentation and validation of a multistate Markov model. Int J Cancer. 2021;148:1973–81. https://doi.org/10.1002/ijc.33437.

21. Chen H, Werner S, Brenner H. Fresh vs Frozen Samples and Ambient Temperature Have Little Effect on Detection of Colorectal Cancer or Adenomas by a Fecal Immunochemical Test in a Colorectal Cancer Screening Cohort in Germany. Clin Gastroenterol Hepatol. 2017;15:1547-1556.e5. https://doi.org/10.1016/j.cgh.2016.10.018.
